# Supplementary material for: Addition of Vindoline to p-Benzoquinone: Regiochemistry, Stereochemistry and Symmetry Considerations
Source: MDPI journal article supplement (doi:10.3390/molecules26216395), 2021-10-22
Supplement: s1 [file s1]

# Supplementary Materials: Addition of vindoline to p-benzoquinone: regiochemistry, stereochemistry and symmetry considerations

Shamsher Ali, Ritchy Leroy, Eric Hénon and Georges Massiot

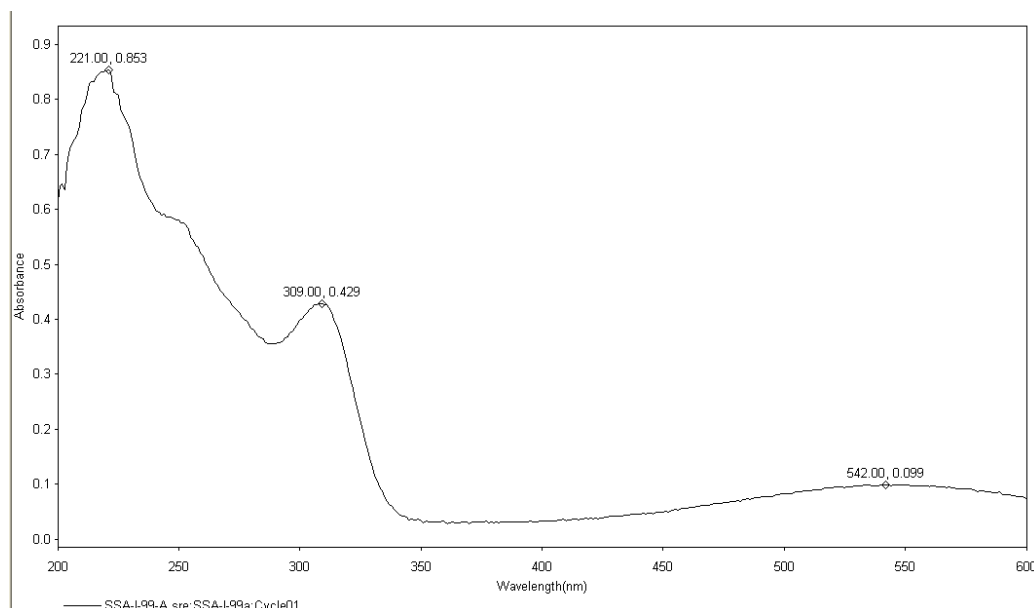

**Figure S1:** UV spectrum of compound **3**

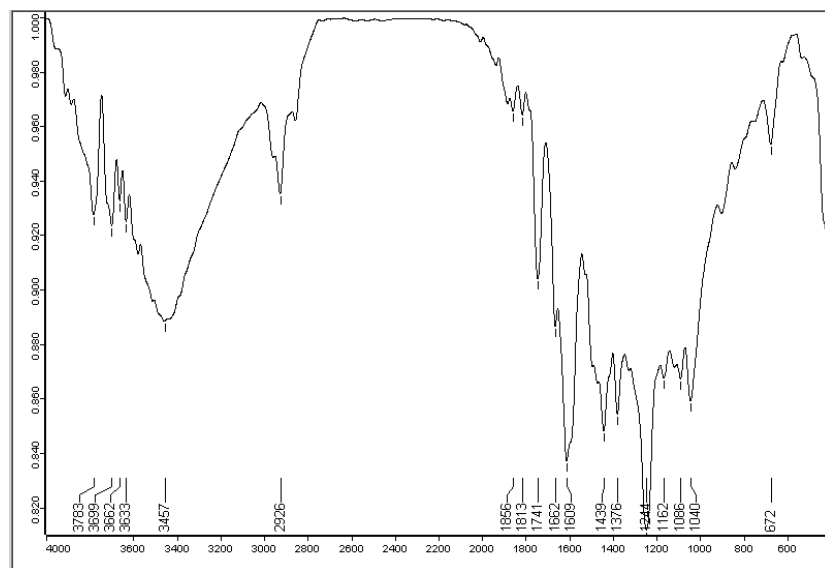

**Figure S2:** IR spectrum of compound **3**

Lower formula:

Upper formula:

Note: for m < 2000 the elements C, H, N, and O are considered implicitly.

Adducts, pos.  ☐ Collect adducts

Adducts, neg.

Measured m/z  Tolerance:  ppm Charge:

| Meas. m/z | # | Ion Formula                                                    | m/z      | err [ppm] | mSigma | # mSigma | Score  | rdB  | e <sup>-</sup> Conf | N-Rule |
|-----------|---|----------------------------------------------------------------|----------|-----------|--------|----------|--------|------|---------------------|--------|
| 563.2403  | 1 | C <sub>31</sub> H <sub>35</sub> N <sub>2</sub> O <sub>8</sub>  | 563.2388 | -2.6      | 194.2  | 1        | 100.00 | 15.5 | even                | ok     |
| 563.2403  | 2 | C <sub>28</sub> H <sub>27</sub> N <sub>12</sub> O <sub>2</sub> | 563.2374 | -5.0      | 195.2  | 2        | 31.47  | 21.5 | even                | ok     |
| 563.2403  | 3 | C <sub>20</sub> H <sub>35</sub> N <sub>8</sub> O <sub>11</sub> | 563.2420 | 3.0       | 243.5  | 3        | 0.95   | 7.5  | even                | ok     |

☐ Automatically locate monoisotopic peak Maximum number of formulae

☒ Check rings plus double bonds Minimum  Maximum

Electron configuration

☒ Filter H/C element ratio Minimum H/C:  Maximum H/C:

☒ Estimate carbon number ☒ Generate immediately

**Figure S3:** HRESI-MS spectrum of compound **3**

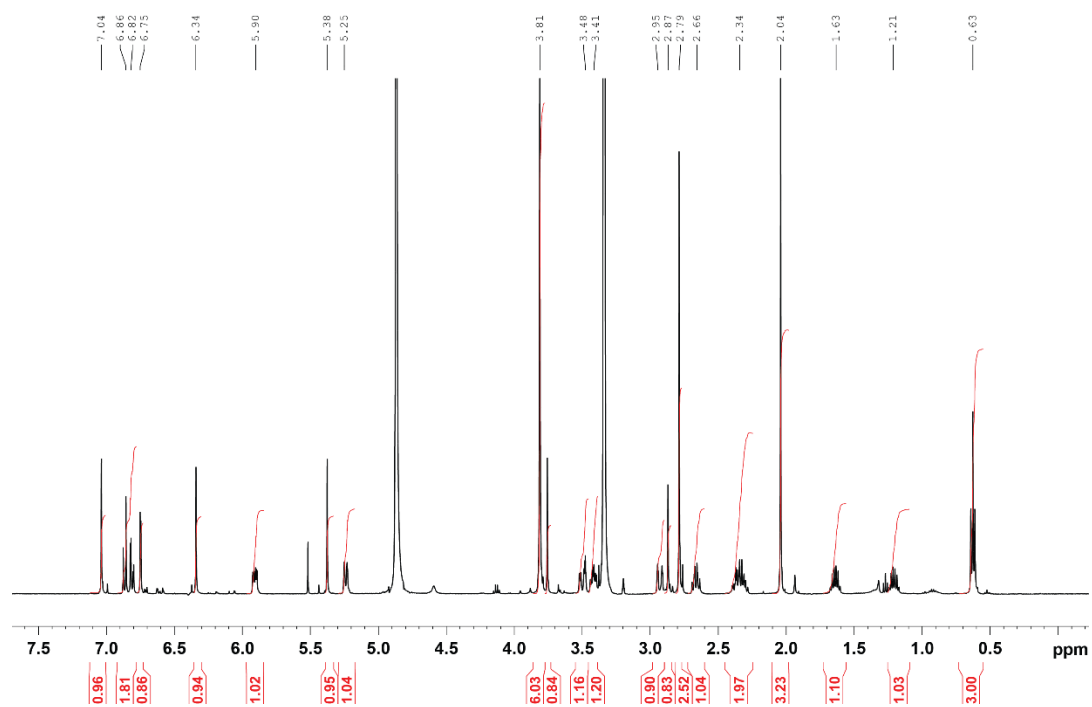

**Figure S4:** <sup>1</sup>H NMR spectrum of compound **3**

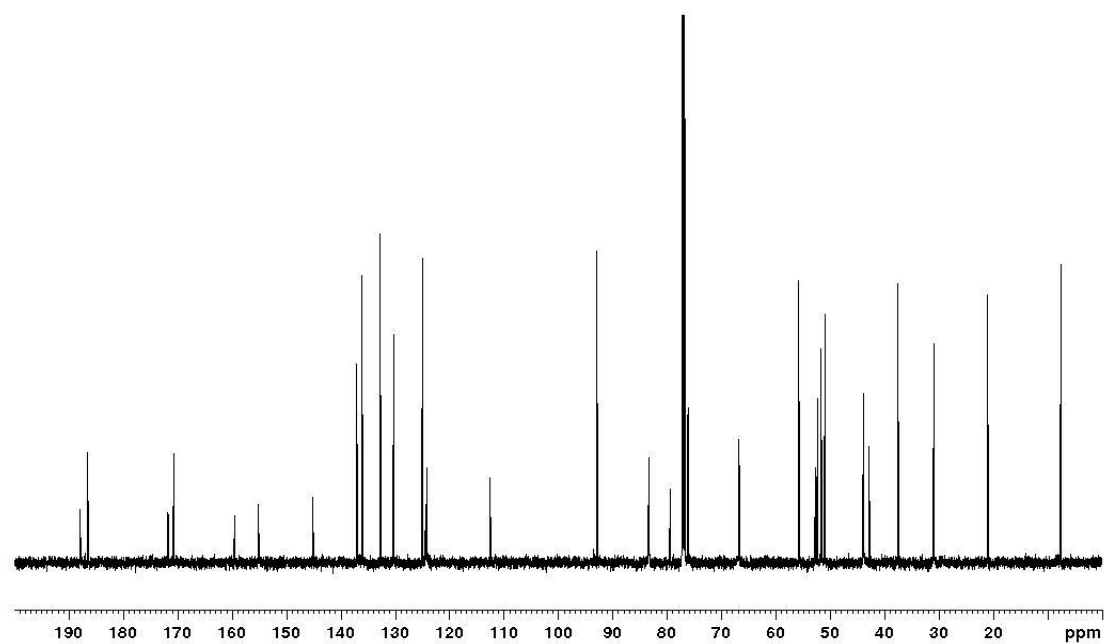

**Figure S5:**  $^{13}\text{C}$  NMR spectrum of compound **3**

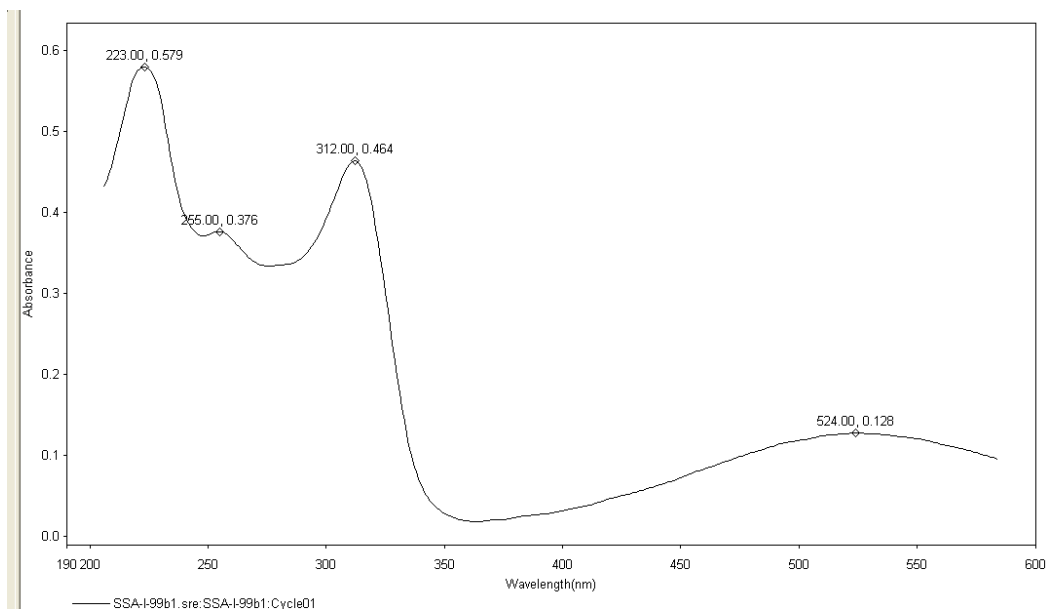

**Figure S6:** UV spectrum of compound **4**

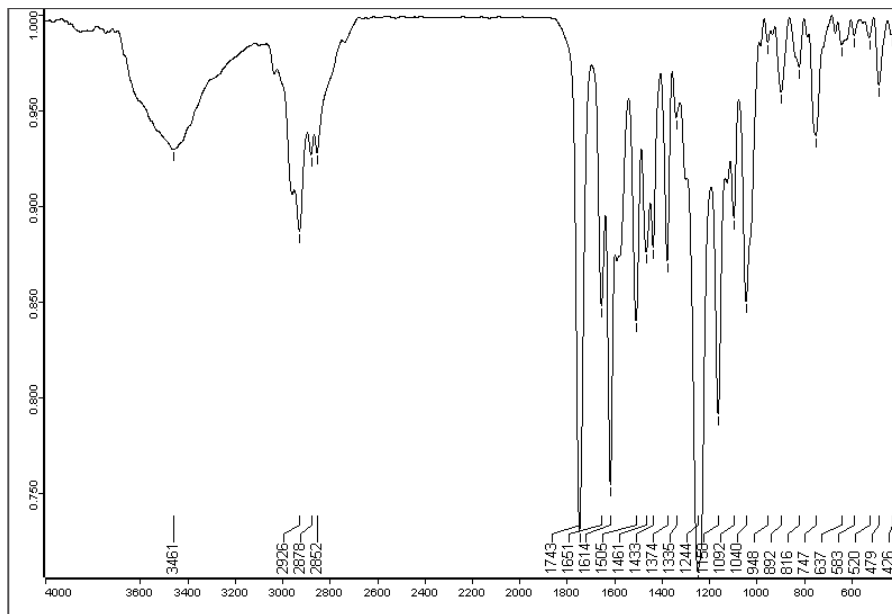

**Figure S7:** IR spectrum of compound **4**

Lower formula:

Upper formula:

Note: for m < 2000 the elements C, H, N, and O are considered implicitly.

Adducts, pos.  ☐ Collect adducts

Adducts, neg.

Measured m/z  Tolerance:  mDa Charge:

| Meas. m/z | # | Ion Formula                                                     | m/z       | err [ppm] | mSigma | # mSigma | Score  | rdb  | e <sup>-</sup> Conf | N-Rule |
|-----------|---|-----------------------------------------------------------------|-----------|-----------|--------|----------|--------|------|---------------------|--------|
| 1017.4494 | 1 | C <sub>57</sub> H <sub>61</sub> N <sub>8</sub> O <sub>10</sub>  | 1017.4505 | 1.1       | 38.3   | 1        | 69.45  | 31.5 | even                | ok     |
| 1017.4494 | 2 | C <sub>59</sub> H <sub>63</sub> N <sub>5</sub> O <sub>11</sub>  | 1017.4519 | 2.4       | 40.1   | 2        | 24.87  | 31.0 | odd                 | ok     |
| 1017.4494 | 3 | C <sub>60</sub> H <sub>59</sub> N <sub>9</sub> O <sub>7</sub>   | 1017.4532 | 3.8       | 40.6   | 3        | 6.43   | 36.0 | odd                 | ok     |
| 1017.4494 | 4 | C <sub>56</sub> H <sub>65</sub> N <sub>4</sub> O <sub>14</sub>  | 1017.4492 | -0.2      | 42.7   | 4        | 100.00 | 26.5 | even                | ok     |
| 1017.4494 | 5 | C <sub>58</sub> H <sub>67</sub> N <sub>10</sub> O <sub>15</sub> | 1017.4505 | 1.1       | 42.8   | 5        | 61.14  | 26.0 | odd                 | ok     |

☐ Automatically locate monoisotopic peak Maximum number of formulae

☒ Check rings plus double bonds Minimum  Maximum

Electron configuration

☒ Filter H/C element ratio Minimum H/C:  Maximum H/C:

☒ Estimate carbon number ☒ Generate immediately

**Figure S8:** HRESI-MS spectrum of compound **4**

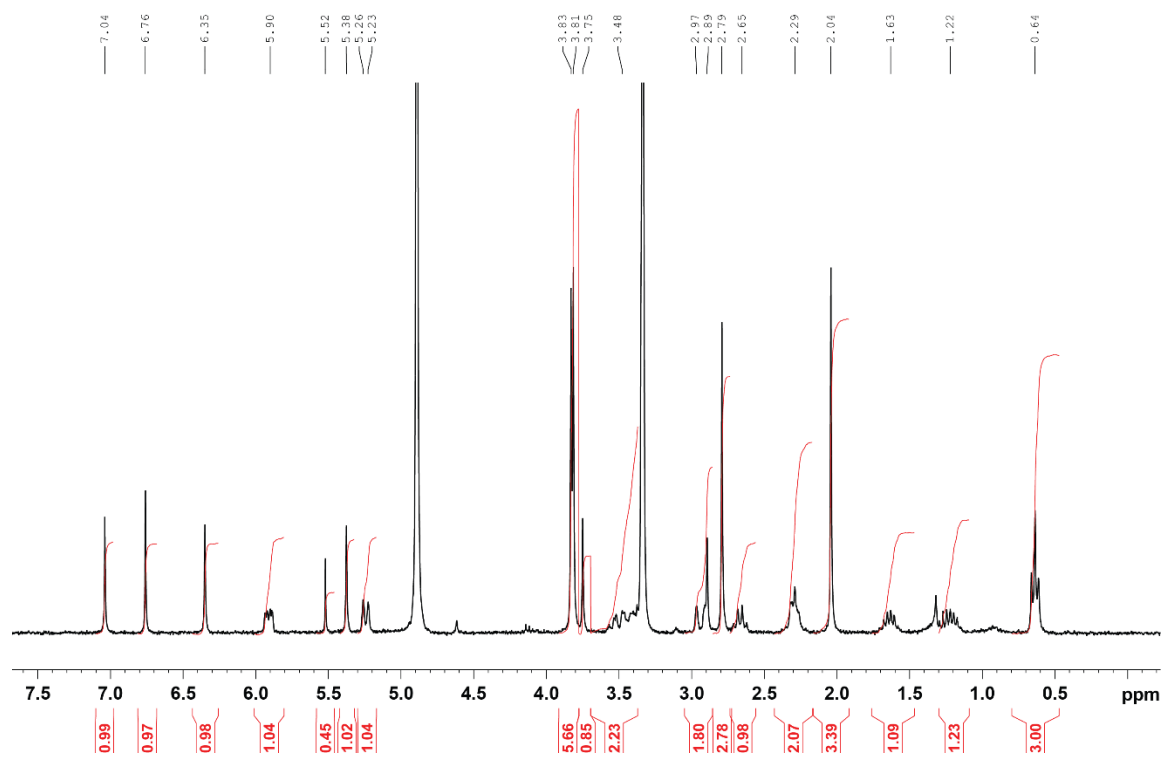

**Figure S9:**  $^1\text{H}$  NMR spectrum of compound **4**

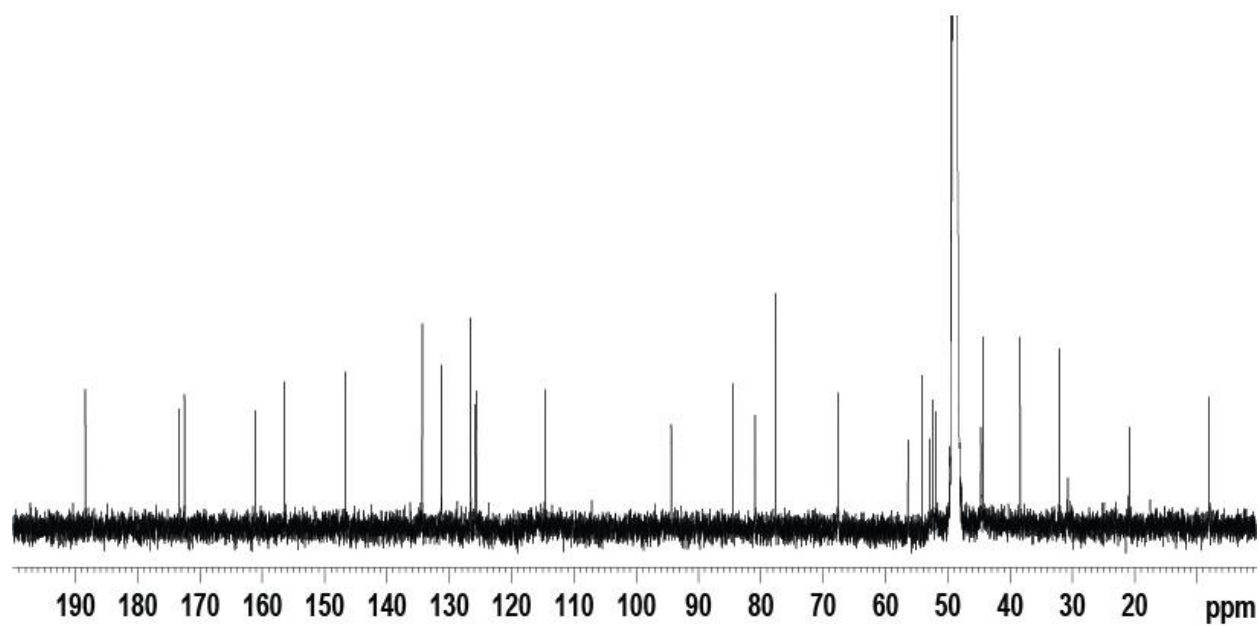

**Figure S10:**  $^{13}\text{C}$  NMR spectrum of compound **4**

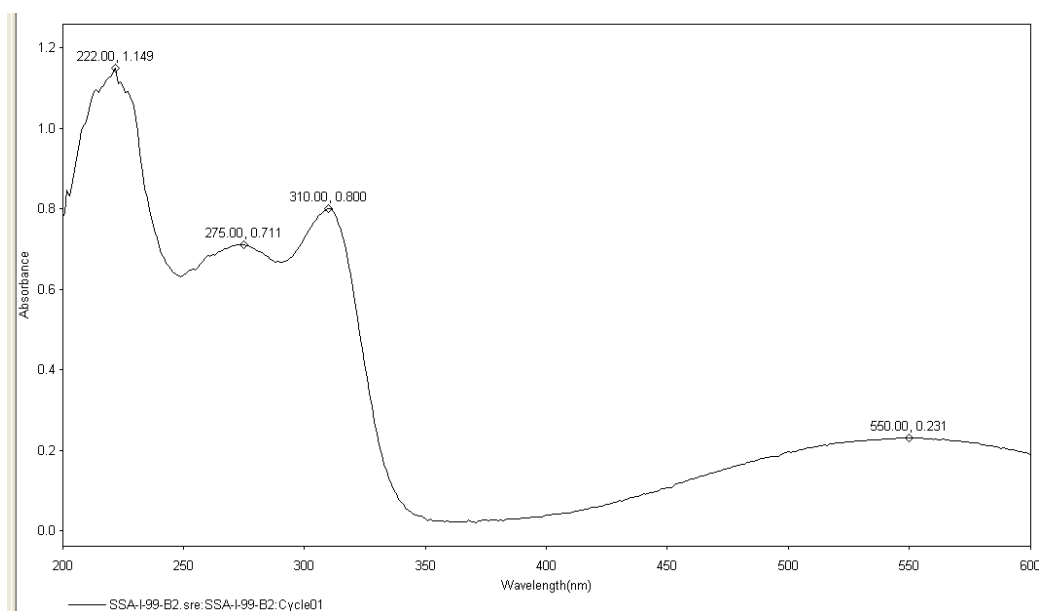

**Figure S11:** UV spectrum of compound **5**

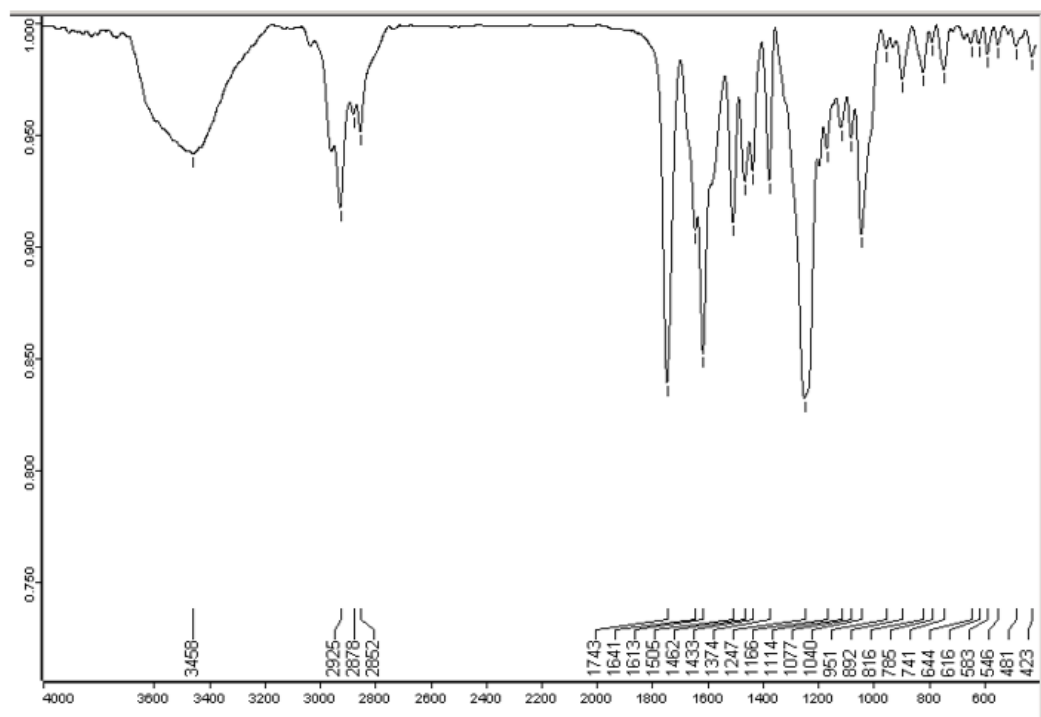

**Figure S12:** IR spectrum of compound **5**

Lower formula:

Upper formula:

Note: for m < 2000 the elements C, H, N, and O are considered implicitly.

Adducts, pos.  ☐ Collect adducts

Adducts, neg.

Measured m/z  Tolerance:  ppm Charge:

| Meas. m/z | # | Ion Formula | m/z       | err [ppm] | mSigma | # mSigma | Score  | rdb  | e <sup>-</sup> Conf | N-Rule |
|-----------|---|-------------|-----------|-----------|--------|----------|--------|------|---------------------|--------|
| 1017.4493 | 1 | C53H57N14O8 | 1017.4478 | -1.5      | 34.4   | 1        | 52.12  | 32.5 | even                | ok     |
| 1017.4493 | 2 | C54H53N18O4 | 1017.4492 | -0.2      | 37.2   | 2        | 100.00 | 37.5 | even                | ok     |
| 1017.4493 | 3 | C56H65N4O14 | 1017.4492 | -0.2      | 40.6   | 3        | 91.69  | 26.5 | even                | ok     |

☐ Automatically locate monoisotopic peak Maximum number of formulae

☒ Check rings plus double bonds Minimum  Maximum

Electron configuration

☒ Filter H/C element ratio Minimum H/C:  Maximum H/C:

☒ Estimate carbon number ☒ Generate immediately

**Figure S13:** HRESI-MS spectrum of compound **5**



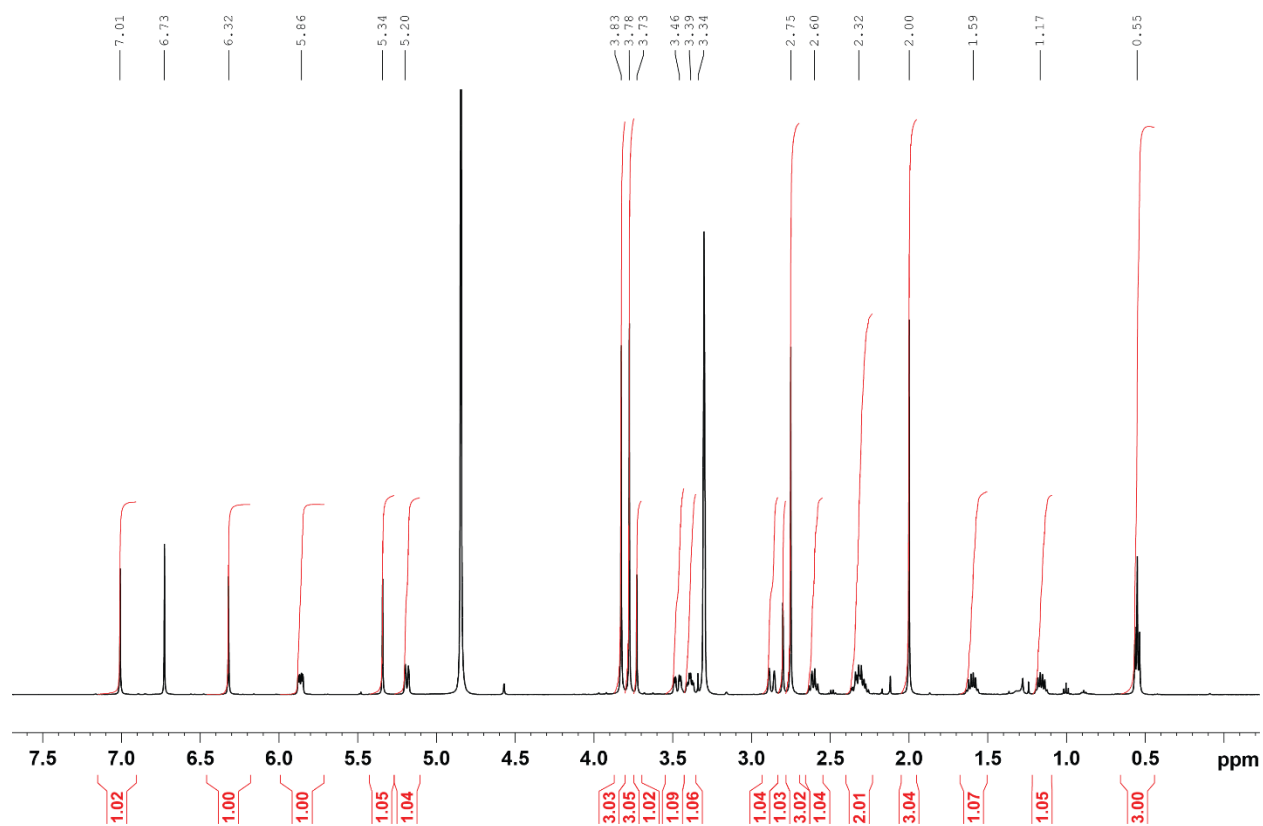

**Figure S14:** <sup>1</sup>H NMR spectrum of compound **5** (peak at 5.5 ppm is CH<sub>2</sub>Cl<sub>2</sub>).

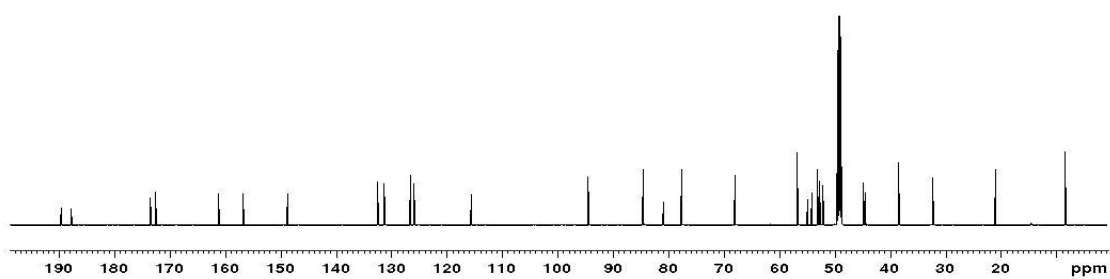

**Figure S15:**  $^{13}\text{C}$  NMR spectrum of compound **5**

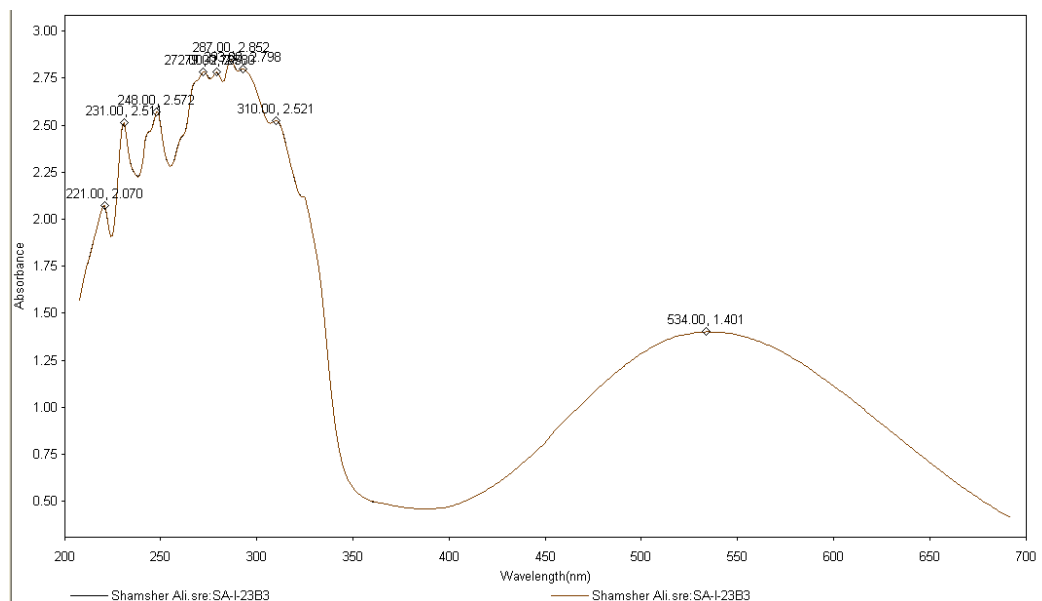

**Figure-16:** UV spectrum of compounds **6**

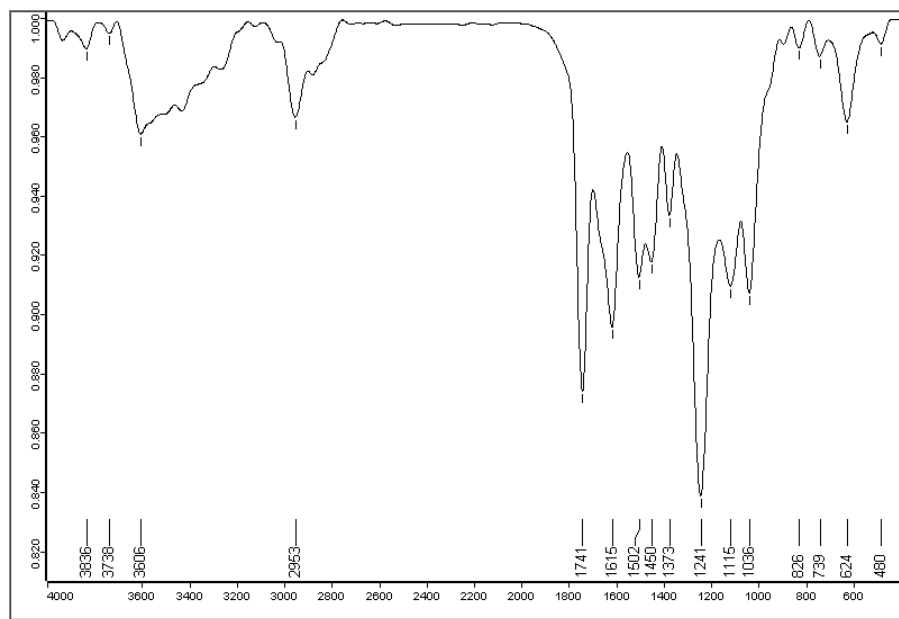

**Figure S17:** IR spectrum of compounds **6**

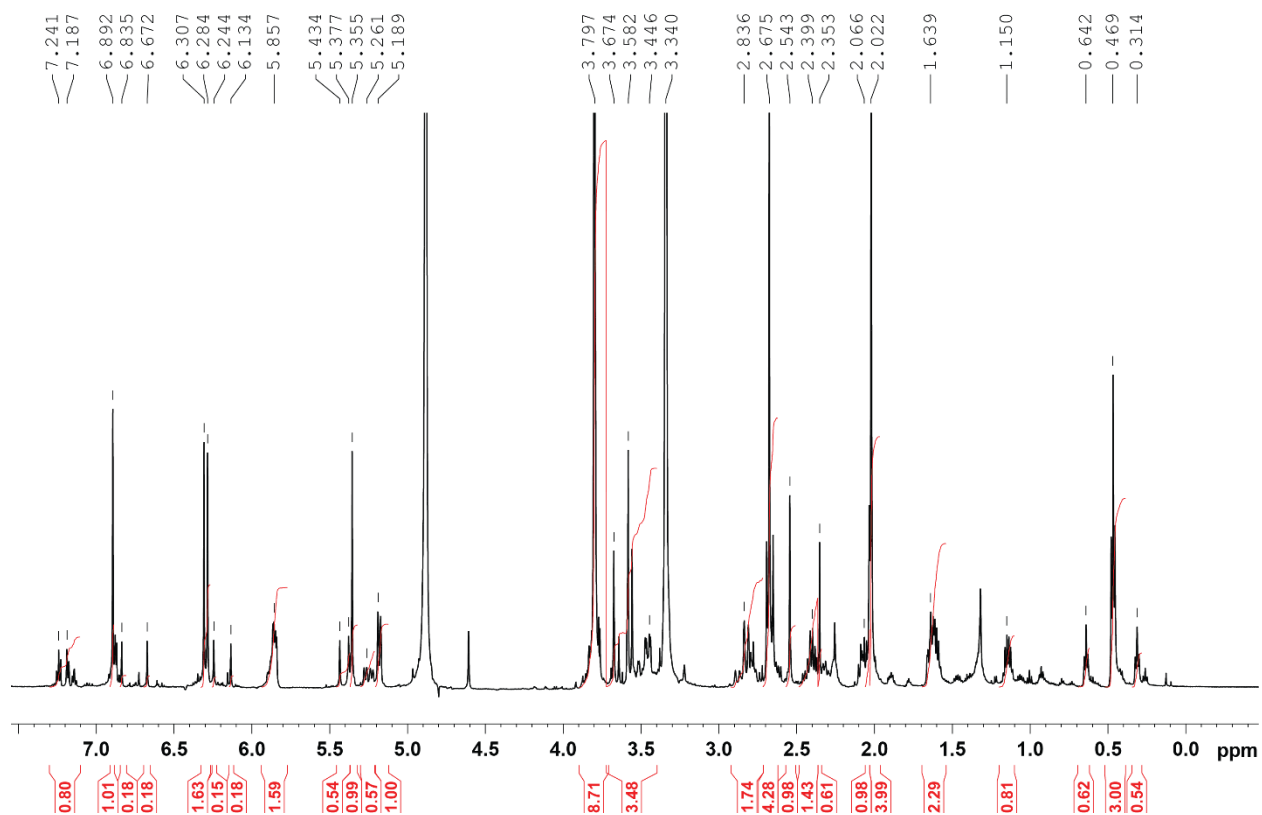

**Figure S18:** <sup>1</sup>H NMR spectrum of compounds **6**

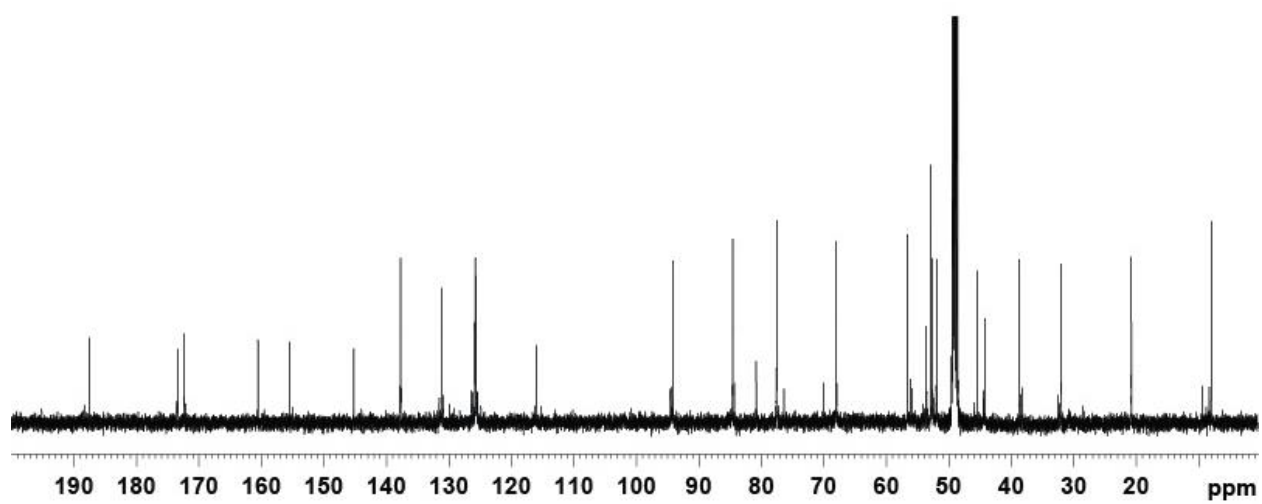

**Figure S19:** <sup>13</sup>C NMR spectrum of compound **6**

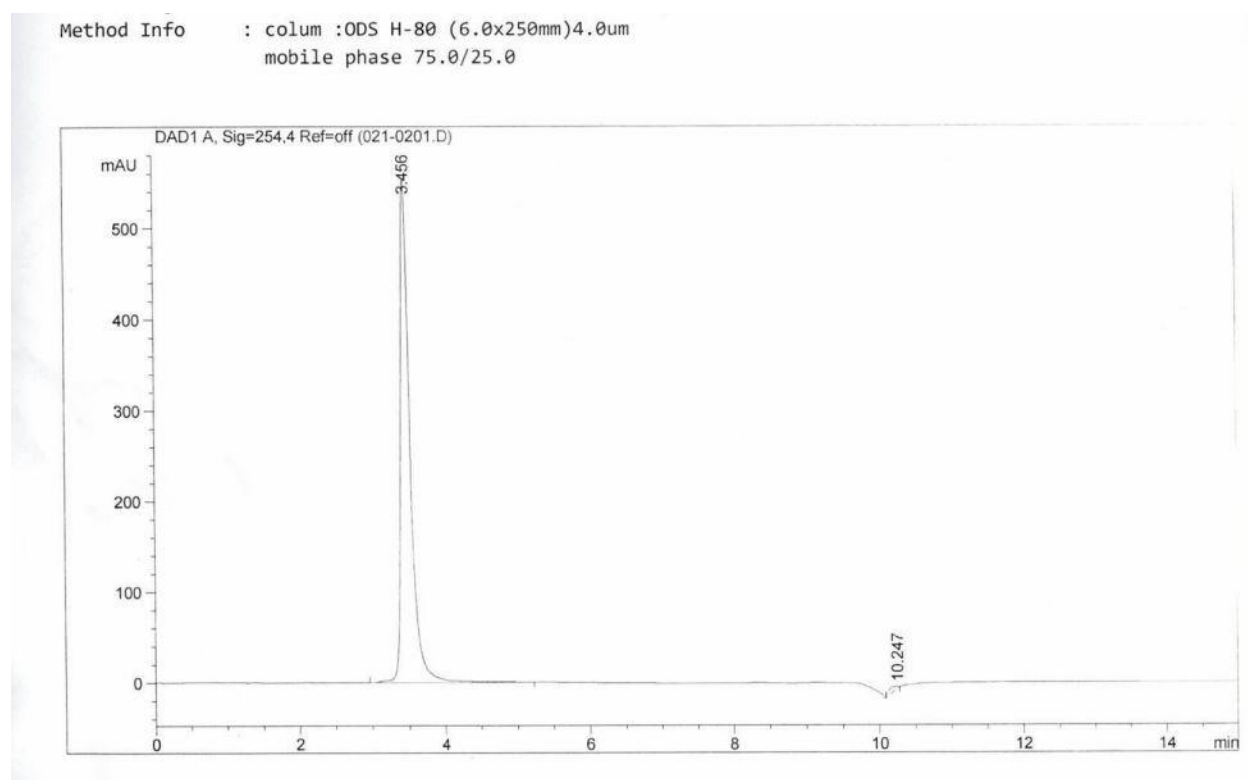

**Figure S20:** UPLC profile of compound **6**

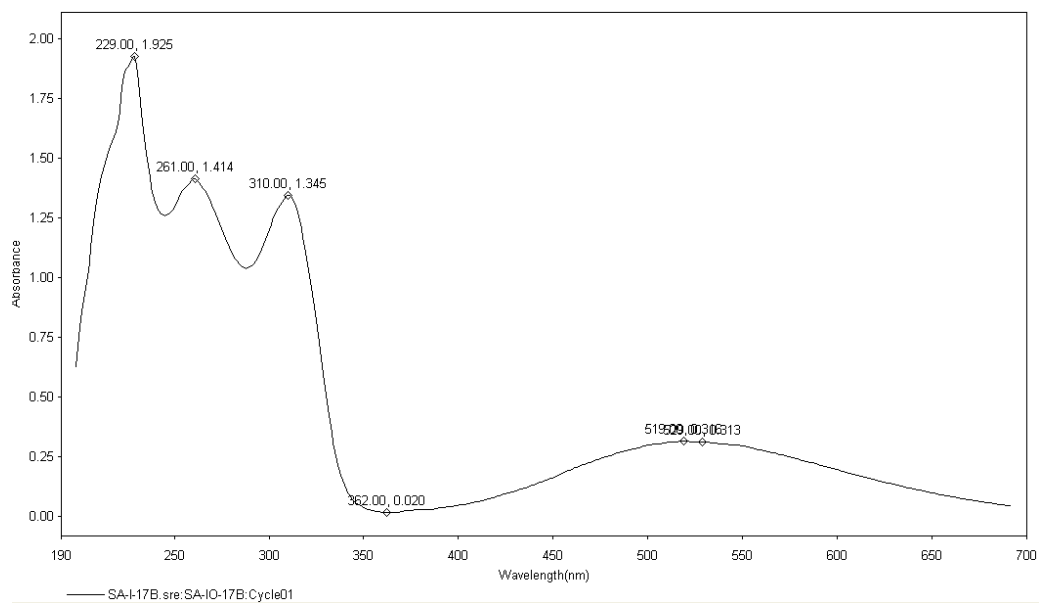

**Figure S21:** UV spectrum of compound **7**

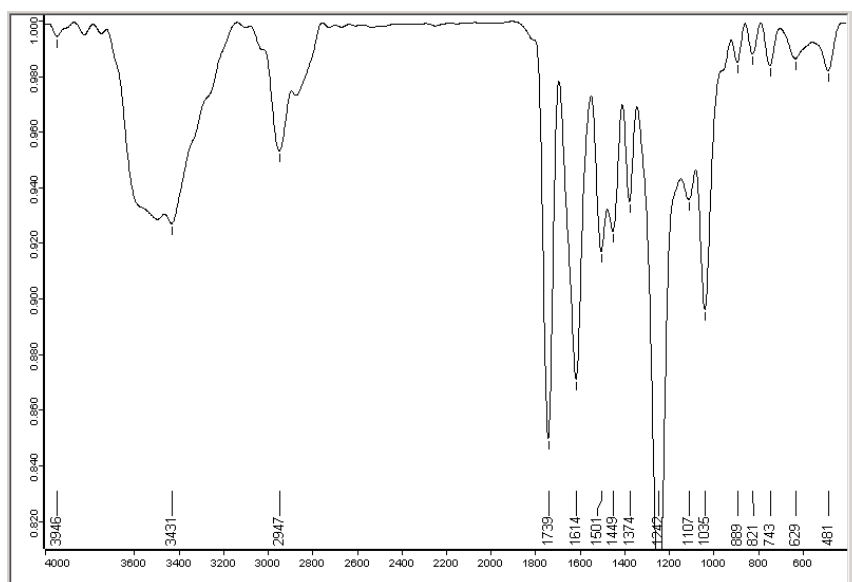

**Figure S22:** IR spectrum of compounds **7**

Lower formula:

Upper formula:

Note: for m < 2000 the elements C, H, N, and O are considered implicitly.

Adducts, pos.  ☐ Collect adducts

Adducts, neg.

Measured m/z  Tolerance:  ppm Charge:

| Meas. m/z | # | Ion Formula                                                    | m/z       | err [ppm] | mSigma | # mSigma | Score  | rdB  | e <sup>-</sup> Conf | N-Rule |
|-----------|---|----------------------------------------------------------------|-----------|-----------|--------|----------|--------|------|---------------------|--------|
| 1471.6633 | 1 | C <sub>81</sub> H <sub>95</sub> N <sub>6</sub> O <sub>20</sub> | 1471.6596 | -2.5      | 26.7   | 1        | 100.00 | 37.5 | even                | ok     |
| 1471.6633 | 2 | C <sub>80</sub> H <sub>95</sub> N <sub>8</sub> O <sub>19</sub> | 1471.6708 | 5.1       | 30.1   | 2        | 0.23   | 37.5 | even                | ok     |
| 1471.6633 | 3 | C <sub>80</sub> H <sub>99</sub> N <sub>2</sub> O <sub>24</sub> | 1471.6582 | -3.4      | 34.5   | 3        | 15.18  | 32.5 | even                | ok     |

☐ Automatically locate monoisotopic peak Maximum number of formulae

☒ Check rings plus double bonds Minimum  Maximum

Electron configuration

☒ Filter H/C element ratio Minimum H/C:  Maximum H/C:

☒ Estimate carbon number ☒ Generate immediately

**Figure S23:** HRESI-MS spectrum of compounds **7**

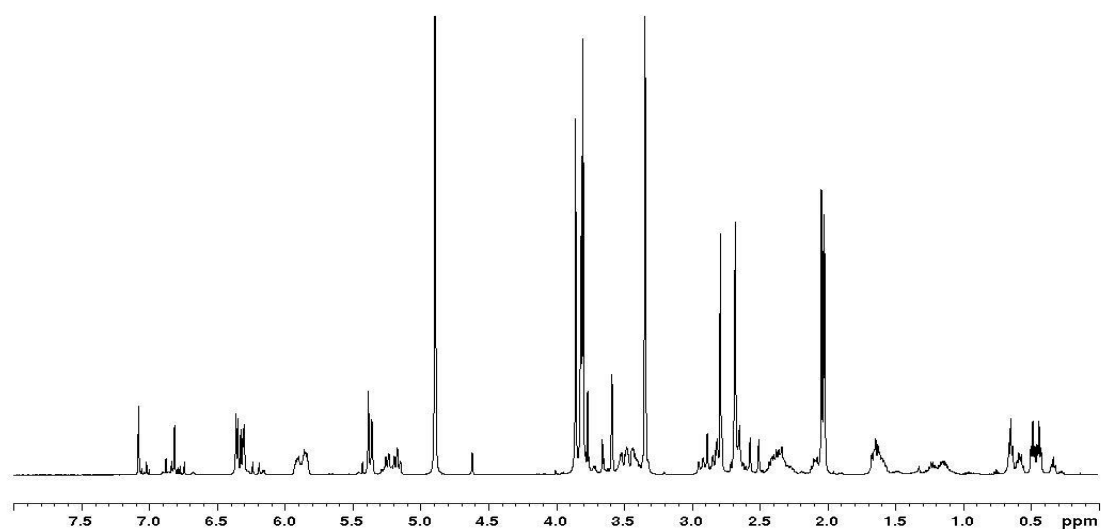

**Figure S24:**  $^1\text{H}$  NMR spectrum of compounds **7**

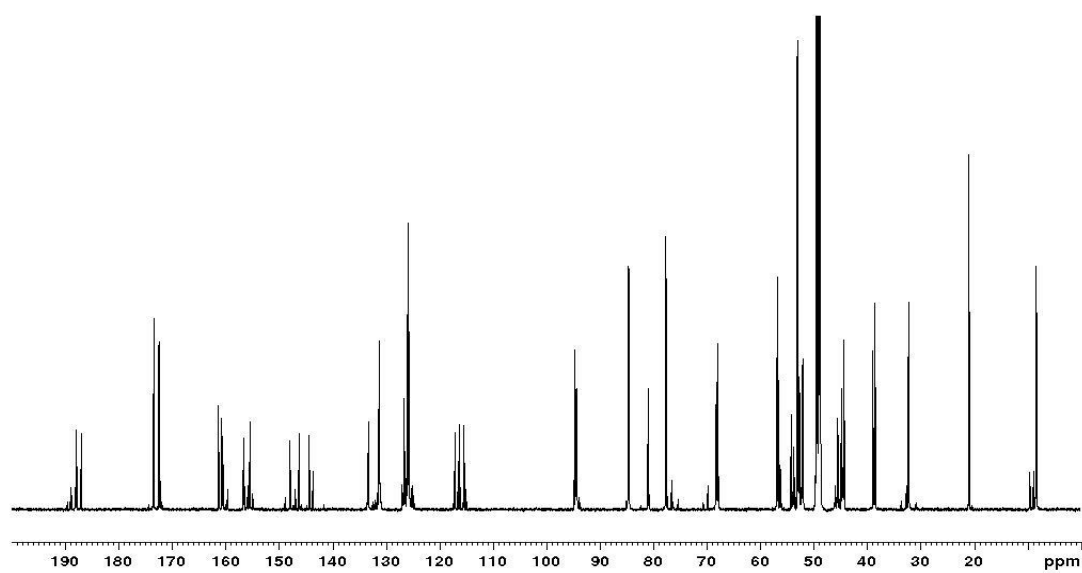

**Figure S25:**  $^{13}\text{C}$  NMR spectrum of compounds **7**

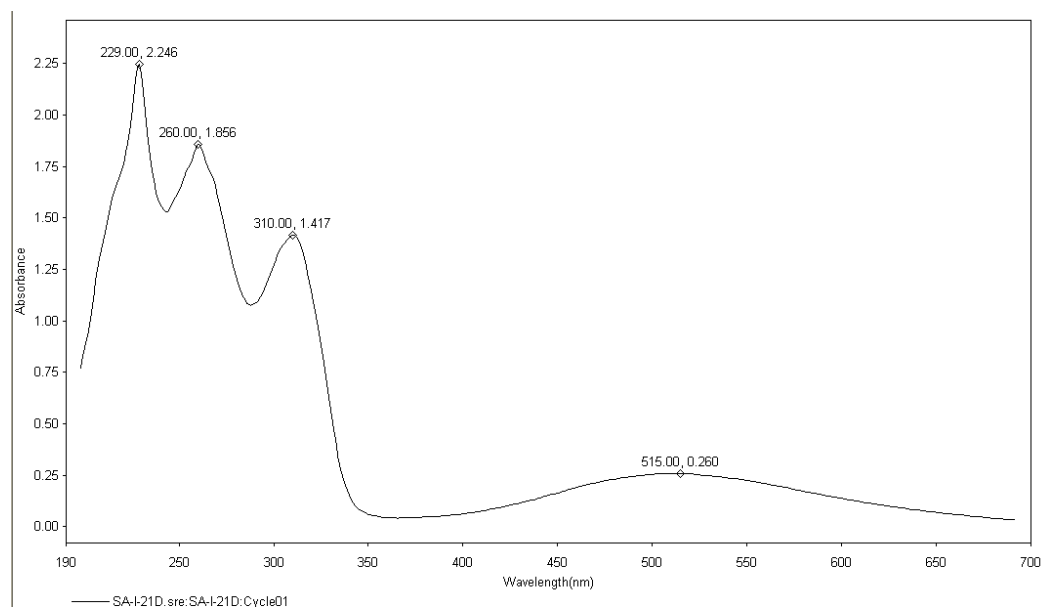

**Figure S26:** UV spectrum of compounds **8**

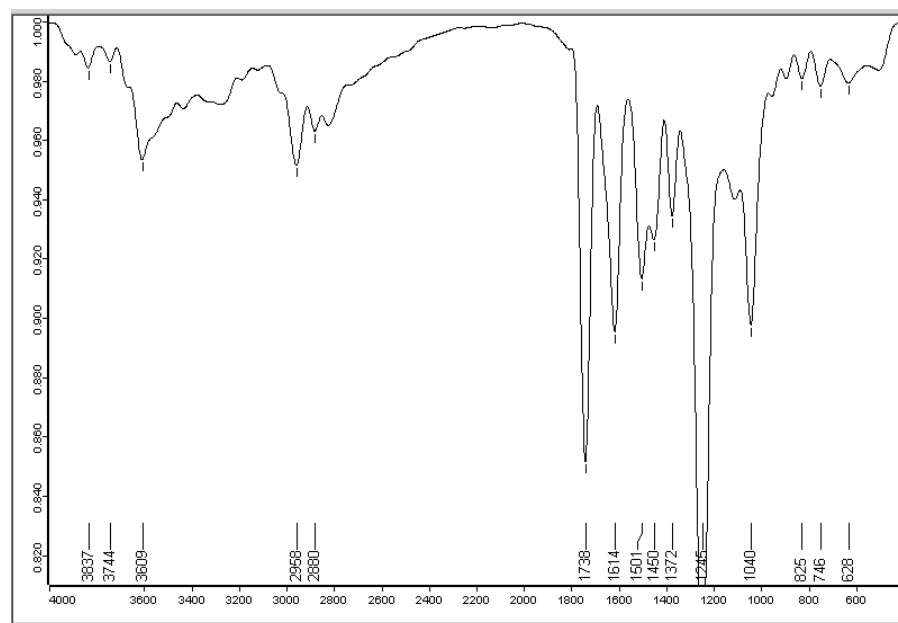

**Figure S27:** IR spectrum of compounds **8**



Lower formula:

Upper formula:

Note: for m < 2000 the elements C, H, N, and O are considered implicitly.

Adducts, pos.  ☐ Collect adducts

Adducts, neg.

Measured m/z  Tolerance:  ppm Charge:

| Meas. m/z | # | Ion Formula                                                      | m/z       | err [ppm] | mSigma | # mSigma | Score  | rdb  | e <sup>-</sup> Conf | N-Rule |
|-----------|---|------------------------------------------------------------------|-----------|-----------|--------|----------|--------|------|---------------------|--------|
| 1925.8702 | 1 | C <sub>106</sub> H <sub>125</sub> N <sub>8</sub> O <sub>26</sub> | 1925.8700 | -0.1      | 46.4   | 1        | 100.00 | 48.5 | even                | ok     |
| 1925.8702 | 2 | C <sub>105</sub> H <sub>123</sub> N <sub>9</sub> O <sub>26</sub> | 1925.8574 | -6.7      | 47.6   | 2        | 0.00   | 49.0 | odd                 | ok     |
| 1925.8702 | 3 | C <sub>102</sub> H <sub>125</sub> N <sub>8</sub> O <sub>29</sub> | 1925.8547 | -8.1      | 52.9   | 3        | 0.00   | 44.5 | even                | ok     |

☐ Automatically locate monoisotopic peak Maximum number of formulae

☒ Check rings plus double bonds Minimum  Maximum

Electron configuration

☒ Filter H/C element ratio Minimum H/C:  Maximum H/C:

☒ Estimate carbon number ☒ Generate immediately

**Figure S28:** HR-ESI-MS spectrum of compounds **8**

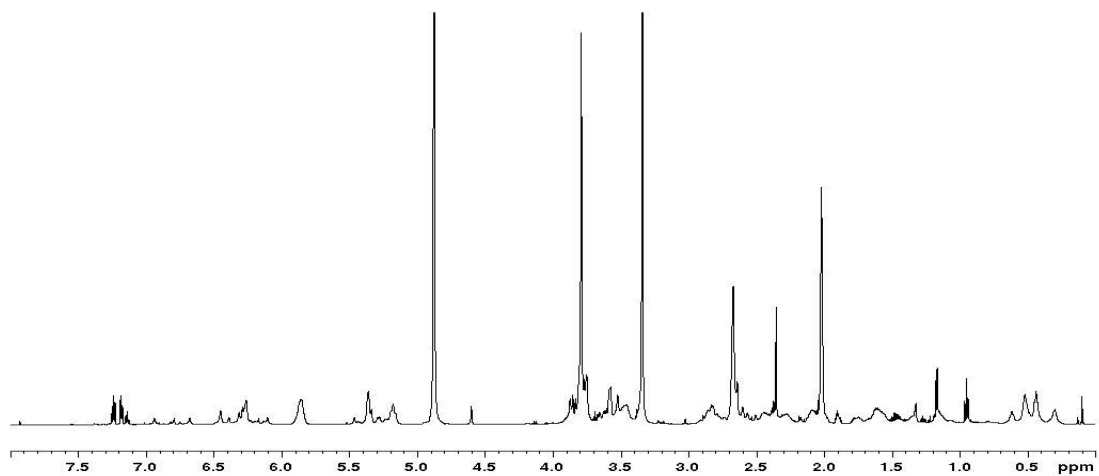

**Figure S29:**  $^1\text{H}$  NMR spectrum of compounds **8**

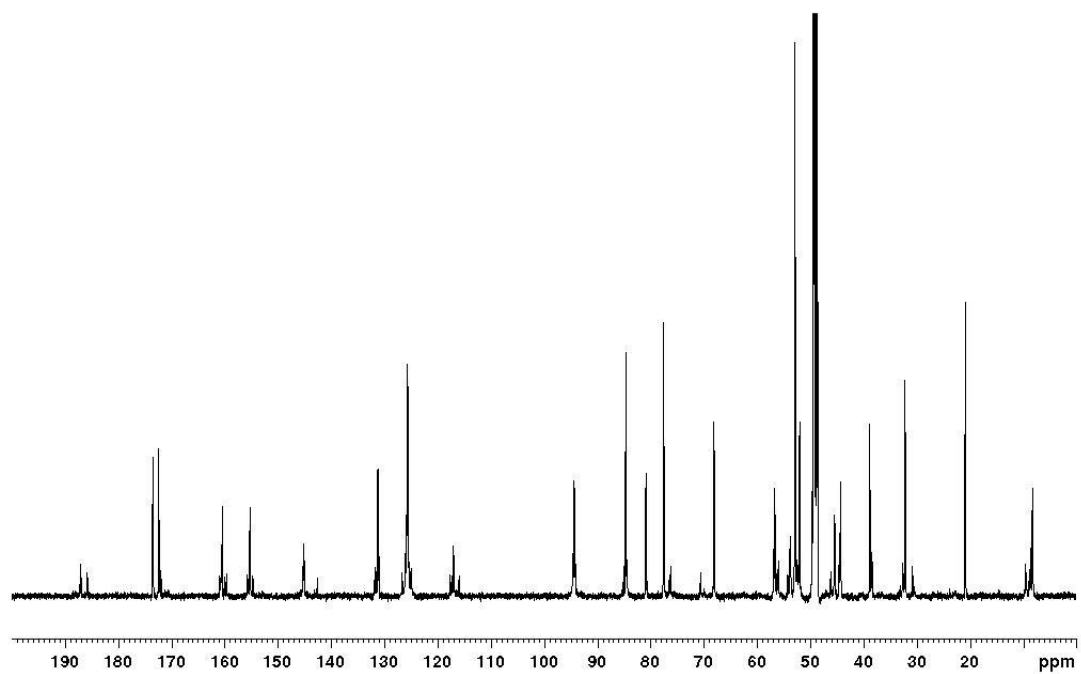

**Figure S30:**  $^{13}\text{C}$  NMR spectrum of compounds **8**

**Table S1:**  $^{13}\text{C}$  NMR data for compounds **1**, **3** ( $\text{CDCl}_3$ ), **4**, **5** and **6a** ( $\text{CD}_3\text{OD}$ ). The central spectral line of the solvent was used as a reference.

| <b>C</b>                       | <b>Vindoline<br/>1</b> | <b>Mono-<br/>adduct 3</b> | <b>Di-adduct 4</b> | <b>Di-adduct 5</b> | <b>Gem<br/>adduct 6a</b> |
|--------------------------------|------------------------|---------------------------|--------------------|--------------------|--------------------------|
| 2                              | 83.2                   | 83.3                      | 84.5               | 84.4               | 84.6                     |
| 3                              | 50.9                   | 50.9                      | 51.8               | 52.0               | 51.9                     |
| 5                              | 51.7                   | 51.6                      | 52.4               | 52.6               | 52.7                     |
| 6                              | 43.9                   | 43.9                      | 44.7               | 44.6               | 44.4                     |
| 7                              | 52.6                   | 52.7                      | 54.1               | 54.0               | 53.6                     |
| 8                              | 124.8                  | 124.4                     | 125.9              | 125.9              | 125.7                    |
| 9                              | 122.5                  | 125.0                     | 126.6              | 126.5              | 125.8                    |
| 10                             | 104.4                  | 112.6                     | 114.6              | 115.5              | 116.0                    |
| 11                             | 160.9                  | 159.5                     | 161.1              | 161.2              | 160.6                    |
| 12                             | 95.6                   | 92.9                      | 94.4               | 94.4               | 94.1                     |
| 13                             | 153.5                  | 155.1                     | 156.5              | 156.7              | 155.5                    |
| 14                             | 129.9                  | 124.2                     | 125.8              | 125.8              | 125.6                    |
| 15                             | 130.3                  | 130.3                     | 131.3              | 131.2              | 131.1                    |
| 16                             | 79.4                   | 79.4                      | 80.9               | 80.8               | 80.8                     |
| 17                             | 76.1                   | 76.2                      | 77.6               | 77.5               | 77.5                     |
| 18                             | 7.5                    | 7.6                       | 8.1                | 8.1                | 8.0                      |
| 19                             | 30.6                   | 30.9                      | 32.1               | 32.1               | 32.1                     |
| 20                             | 42.7                   | 42.8                      | 44.3               | 44.3               | 44.2                     |
| 21                             | 66.8                   | 66.8                      | 67.6               | 67.9               | 68.0                     |
| $\text{C}\text{OOCH}_3$        | 171.7                  | 171.8                     | 173.4              | 173.4              | 173.4                    |
| $\text{COO}\text{C}$           | 52.0                   | 52.3                      | 52.9               | 52.9               | 52.9                     |
| $\text{O}\text{C}\text{OCH}_3$ | 170.5                  | 170.7                     | 172.5              | 172.5              | 172.4                    |
| $\text{OCO}\text{C}$           | 20.9                   | 21.6                      | 20.8               | 20.8               | 20.8                     |
| $\text{N}\text{CH}_3$          | 38.0                   | 37.6                      | 38.3               | 38.3               | 38.7                     |
| $\text{ArO}\text{C}$           | 55.1                   | 55.8                      | 56.4               | 56.6               | 56.6                     |
| 1'                             |                        | 188.0                     | 188.3              | 189.6              | 187.5                    |
| 2'                             |                        | 145.1                     | 146.7              | 148.7              | 145.2                    |
| 3'                             |                        | 132.8                     | 134.3              | 132.4              | 145.2                    |
| 4'                             |                        | 186.5                     | 188.3              | 187.8              | 187.5                    |
| 5'                             |                        | 136.1                     | 146.7              | 132.4              | 137.7                    |
| 6'                             |                        | 137.0                     | 134.3              | 148.7              | 137.7                    |

**Table S2.** Energetics obtained at the DFT (M06-2X/6-311G\*\*) level of theory, considering the methanol implicit solvent (CPCM). Values given in hartree.

|                  | E          | H° <sub>0K</sub> | H° <sub>298K</sub> | G° <sub>298K</sub> |
|------------------|------------|------------------|--------------------|--------------------|
| <b>6a1</b> anti1 | -1072.4627 | -1072.1481       | -1072.1267         | -1072.1974         |
| <b>6a1</b> anti2 | -1072.4626 | -1072.1480       | -1072.1263         | -1072.1992         |
| <b>6b</b> syn    | -1072.4639 | -1072.1490       | -1072.1276         | -1072.1980         |
| TS anti1 ↔ anti2 | -1072.4599 | -1072.1455       | -1072.1246         | -1072.1953         |
| TS anti1 ↔ syn   | -1072.4300 | -1072.1158       | -1072.0951         | -1072.1645         |
| TS syn ↔ syn     | -1072.4596 | -1072.1451       | -1072.1242         | -1072.1242         |

I. Views of **6a** and **6b** isomers:

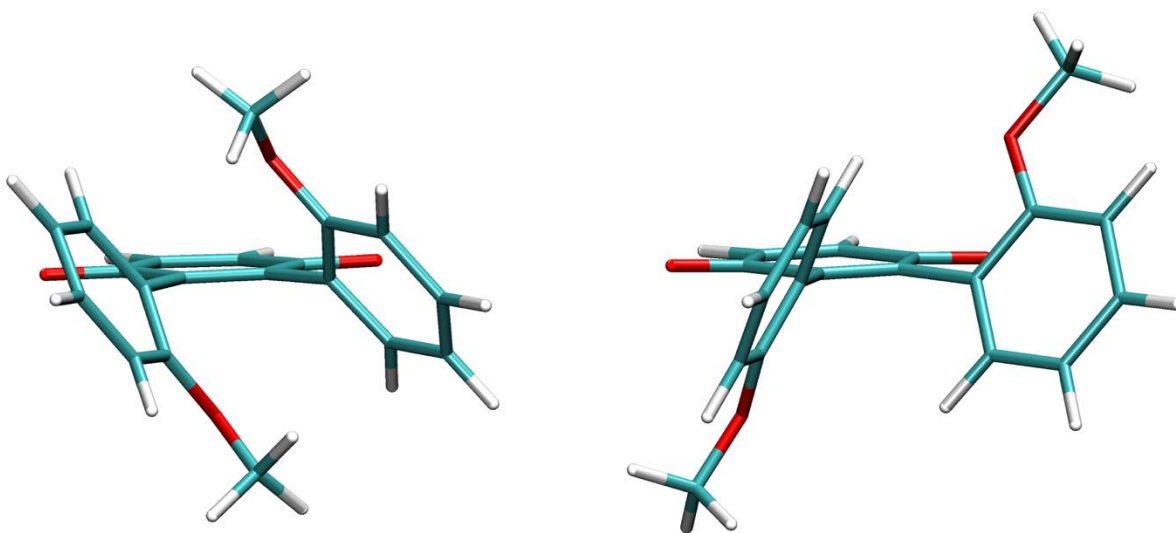

**Fig. S1** **6a1** anti1 and anti2 representations (from optimized M06-2X/6-311G\*\* geometry).

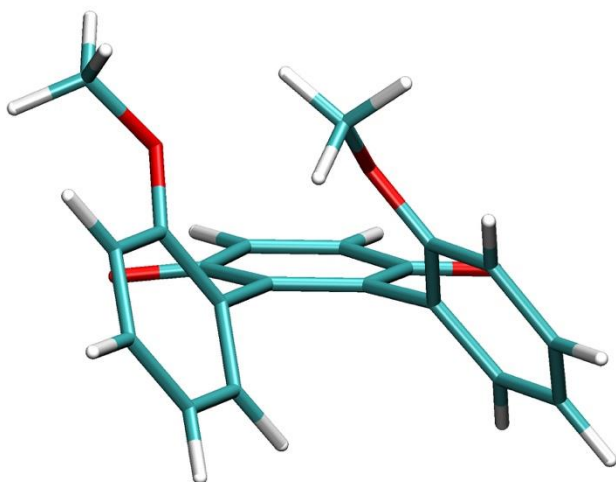

**Fig. S2 6b** syn representation (from optimized M06-2X/6-311G\*\* geometry).
